# Supplementary material for: Antibiotic cocktail followed by Clostridium butyricum (CBM588) supplementation improves colonic anastomotic healing in mice
Source: Research Square preprint supplement (doi:10.21203/rs.3.rs-2448867/v1), 2023-01-30
Supplement: Supplementary file 1 [file 4831de7f9507503d09e58ae7.docx]

**Supplementary figure legends**

**Supplementary Fig. 1.** (A) Transverse colotomy of the sigmoid colon. (B) Colonic anastomosis by interrupted 7-0 nylon stitches.

**Supplementary Fig. 2.** Examples of adhesion score measurement. (A) Only part of the adhesions can be removed bluntly. (B) No adhesions can be removed bluntly.

**Supplementary Fig. 3.** Histopathological scoring. (A) The histological sections of the anastomosis site. (B) Example of a necrosis area in the anastomosis site.
