# Supplementary material for: Antibiotic cocktail followed by Clostridium butyricum (CBM588) supplementation improves colonic anastomotic healing in mice
Source: Research Square preprint supplement (doi:10.21203/rs.3.rs-2448867/v1), 2023-01-30
Supplement: Supplementary file 2 [file 7480f49dbdefc8c4cf79362e.docx]

| Supplementary Table 1. Post-operative score sheet for performance evaluation | |
| --- | --- |
| **Criteria** | **Score points** |
| Weight | 0 = no reduction |
| 1 = reduction of 0–5% |
| 2 = reduction of 6–10% |
| 3 = reduction of 11–19% |
| 4 = reduction of > 19% |
| Fur | 0 = normal, shiny, smooth |
| 1 = piloerection |
| Behavior | 0 = normal |
| 1 = subdued, no exploration, reduced interaction |
| 4 = apathy, isolation, stereotypic behavior |
| Posture | 0 = normal |
| 2 = intermittent cowering or shivering |
| 4 = permanent cowering or shivering |
| Pain | 0 = no indication |
| 2 = defensive behavior on palpation of abdomen |

Supplementary Table 2. Histological healing score of the anastomosis.

| **Criteria** | **Score points** |
| --- | --- |
| Blood vessel ingrowth | 0 = no evidence  1= occasional evidence  2 = light scattering  3 = abundant evidence  4 = confluent cells or fibers |
| Fibroblasts | 0 = no evidence  1= occasional evidence  2 = light scattering  3 = abundant evidence  4 = confluent cells or fibers |
| Collagen formation | 0 = no evidence  1= occasional evidence  2 = light scattering  3 = abundant evidence  4 = confluent cells or fibers |
| Inflammatory cells | 1 = abundant evidence  2 = light scattering  3 = occasional evidence  4 = no evidence |
| First layer in which continuity has been restored (counted from the mucosa outwards toward serosa) | 1 = serosa  2 = muscularis  3 = submucosa  4 = mucosa |
| Number of healed layers | 0-4 (none, mucosa, submucosa, muscularis, serosa) |
| Epithelium closed | 0 = no  1 = yes |
| Crypt architecture restored | 0 = no  1 = yes |
| Overall healing quality | 1 = bad  2 = normal  3 = good |
